# Supplementary material for: The Self-Limiting Dynamics of TGF-β Signaling In Silico and In Vitro, with Negative Feedback through PPM1A Upregulation
Source: PubMed Central journal article supplement (PMC4105941; doi:10.1371/journal.pcbi.1003573), 2014-06-05
Supplement: pcbi.1003573.s010.pdf [file pcbi.1003573.s010.pdf]

**Table S1:** Initial Concentrations (I.C.) in nM.

| Species Name                     | Species Description                                                     | I.C.      | Ref. | Model    |
|----------------------------------|-------------------------------------------------------------------------|-----------|------|----------|
| TGF- $\beta$                     | The TGF- $\beta$ ligand                                                 | 80        | [1]  | All      |
| T1R <sub>Surf</sub>              | The type I receptor on the cell surface                                 | 0.237     | [1]  | All      |
| T1R <sub>Cave</sub>              | The type I receptor in the caveolae                                     | 2.092     | [1]  | All      |
| T1R <sub>EE</sub>                | The type I receptor in the early endosome                               | 2.06      | [1]  | All      |
| T2R <sub>Surf</sub>              | The type II receptor on the cell surface                                | 0.202     | [1]  | All      |
| T2R <sub>Cave</sub>              | The type II receptor in the caveolae                                    | 1.778     | [1]  | All      |
| T2R <sub>EE</sub>                | The type II receptor in the early endosome                              | 1.148     | [1]  | All      |
| pT2R <sub>Surf</sub>             | Ligand-bound type II receptor on the cell surface                       | 0         |      | All      |
| pT2R <sub>Cave</sub>             | Ligand-bound type II receptor in the caveolae                           | 0         |      | All      |
| pT2R <sub>EE</sub>               | Ligand-bound type II receptor in the early endosome                     | 0         |      | All      |
| LRC <sub>Surf</sub>              | The ligand-receptor complex on the cell surface                         | 0         |      | All      |
| LRC <sub>Cave</sub>              | The ligand-receptor complex in the caveolae                             | 0         |      | All      |
| LRC <sub>EE</sub>                | The ligand-receptor complex in the early endosome                       | 0         |      | All      |
| T1R:T2R                          | The T1R-T2R complex released from LRC                                   | 0         |      | All      |
| RI                               | The receptor inhibitor SB-431542                                        | 600       | [2]  | All      |
| LRC <sub>EE</sub> :RI            | The complex of the receptor inhibitor and LRC                           | 0         |      | All      |
| LRC:Smad2                        | The complex of Smad2 and LRC                                            | 0         |      | All      |
| Smad2 <sub>Cyt</sub>             | Smad2 in the cytoplasm                                                  | 494.67    | [1]  | All      |
| Smad2 <sub>Nuc</sub>             | Smad2 in the nucleus                                                    | 76.76     | [1]  | All      |
| pSmad2 <sub>Cyt</sub>            | Phosphorylated Smad2 in the cytoplasm                                   | 0         |      | All      |
| pSmad2 <sub>Nuc</sub>            | Phosphorylated Smad2 in the nucleus                                     | 0         |      | All      |
| Smad4 <sub>Cyt</sub>             | Smad4 in the cytoplasm                                                  | 666.65    | [1]  | All      |
| Smad4 <sub>Nuc</sub>             | Smad4 in the nucleus                                                    | 666.65    | [1]  | All      |
| Smad2:Smad4 <sub>Cyt</sub>       | The complex of Smad2 and Smad4 in the cytoplasm                         | 0         |      | All      |
| Smad2:Smad4 <sub>Nuc</sub>       | The complex of Smad2 and Smad4 in the nucleus                           | 0         |      | All      |
| Smad2:Smad2 <sub>Cyt</sub>       | The homo-dimer of Smad2 in the cytoplasm                                | 0         |      | All      |
| Smad2:Smad2 <sub>Nuc</sub>       | The homo-dimer of Smad2 in the nucleus                                  | 0         |      | All      |
| Smad7                            | Smad7                                                                   | 100       |      | 2,3,5,S1 |
| dephLRC <sub>Cave</sub>          | Dephosphorylated LRC in the caveolae                                    | 0         |      | S1       |
| dephLRC <sub>EE</sub>            | Dephosphorylated LRC in the early endosome                              | 0         |      | S1       |
| LRC <sub>Cave</sub> :Smad7       | The complex of Smad7 and LRC in the caveolae                            | 0         |      | S1       |
| LRC <sub>EE</sub> :Smad7         | The complex of Smad7 and LRC in the early endosome                      | 0         |      | S1       |
| PPM1A                            | Overall PPM1A                                                           | 10        |      | S2       |
| PPM1A <sub>Cyt</sub>             | PPM1A in the cytoplasm                                                  | 50        |      | 8,S3     |
| PPM1A <sub>Nuc</sub>             | PPM1A in the nucleus                                                    | 50        |      | 8,S3     |
| PTEN <sub>Cyt</sub>              | PTEN in the cytoplasm                                                   | Estimated |      | 8,S3     |
| PTEN <sub>Nuc</sub>              | PTEN in the nucleus                                                     | 0         |      | 8,S3     |
| pSmad2:PPM1A <sub>Cyt</sub>      | The complex of pSmad2 and PPM1A in the cytoplasm                        | 0         |      | 8,S3     |
| pSmad2:PPM1A:PTEN <sub>Cyt</sub> | The complex of pSmad2 and PPM1A:PTEN in the cytoplasm                   | 0         |      | 8,S3     |
| pSmad2:PTEN <sub>Cyt</sub>       | The complex of pSmad2 and PTEN in the cytoplasm                         | 0         |      | 8,S3     |
| pSmad2:PTEN:PPM1A <sub>Cyt</sub> | The complex of pSmad2:PTEN and PPM1A in the cytoplasm                   | 0         |      | 8,S3     |
| PPM1A:PTEN <sub>Cyt</sub>        | The PPM1A-PTEN complex released from pSmad2:PTEN:PPM1A in the cytoplasm | 0         |      | 8,S3     |
| pSmad2:PPM1A <sub>Nuc</sub>      | The complex of pSmad2 and PPM1A in the nucleus                          | 0         |      | 8,S2,S3  |
| pSmad2:PPM1A:PTEN <sub>Nuc</sub> | The complex of pSmad2 and PPM1A:PTEN in the nucleus                     | 0         |      | 8,S3     |
| PPM1A:PTEN <sub>Nuc</sub>        | The PPM1A-PTEN complex released from pSmad2:PTEN:PPM1A in the nucleus   | 0         |      | 8,S3     |

*Nuclear species have been expressed relative to the concentrations in cytoplasm.*

1. Klipp E, Zi Z (2007) Constraint-based modeling and kinetic analysis of the smad dependent tgf-Beta signaling pathway. *PLoS ONE* 2: e936.

2. Schmierer B, Tournier AL, Bates PA, Hill CS (2008) Mathematical modeling identifies Smad nucleocytoplasmic shuttling as a dynamic signal-interpreting system. *Proc Natl Acad Sci U S A* 105: 6608-6613.
