# Supplementary material for: The Self-Limiting Dynamics of TGF-β Signaling In Silico and In Vitro, with Negative Feedback through PPM1A Upregulation
Source: PubMed Central journal article supplement (PMC4105941; doi:10.1371/journal.pcbi.1003573), 2014-06-05
Supplement: pcbi.1003573.s011.pdf [file pcbi.1003573.s011.pdf]

**Table S2:** Rate Constants

| Rate Constant Name     | Values    | Reference        |
|------------------------|-----------|------------------|
| $v_{T1R}$              | 0.0103    | (Klipp 2007)     |
| $v_{T2R}$              | 0.02869   | (Klipp 2007)     |
| $k_{iEE}$              | 0.33      | (Klipp 2007)     |
| $k_{rEE}$              | 0.033     | (Klipp 2007)     |
| $k_{iCave}$            | 0.33      | (Klipp 2007)     |
| $k_{rCave}$            | 0.03742   | (Klipp 2007)     |
| $k_{degT1R}$           | 0.005     | (Klipp 2007)     |
| $k_{degT2R}$           | 0.025     | (Klipp 2007)     |
| $k_{cd}$               | 0.005     | (Klipp 2007)     |
| $k_{LRC1}$             | estimated |                  |
| $k_{LRC2}$             | estimated |                  |
| $k_{rReceptor}$        | 10000     |                  |
| $k_{fSmad2}$           | estimated |                  |
| $k_{rSmad2}$           | estimated |                  |
| $k_{fSmadsComplex}$    | estimated |                  |
| $k_{rSmadsComplex}$    | estimated |                  |
| $k_{impSmad2}$         | 0.054     | (Schmierer 2008) |
| $k_{expSmad2}$         | 0.348     | (Schmierer 2008) |
| $k_{impSmad4}$         | 0.054     | (Schmierer 2008) |
| $k_{expSmad4}$         | 0.054     | (Schmierer 2008) |
| $k_{impSmadsComplex}$  | 0.27      | (Schmierer 2008) |
| $k_{lid}$              | estimated |                  |
| $k_{deph_{pSmad2}}$    | estimated |                  |
| $k_{deg_{pSmad2}}$     | estimated |                  |
| $v_{Smad2}$            | estimated |                  |
| $k_{degSmad2}$         | estimated |                  |
| $k_{Smad7}$            | estimated |                  |
| $k_{fSmad7_{Cave}}$    | estimated |                  |
| $k_{bSmad7_{Cave}}$    | estimated |                  |
| $k_{fSmad7_{EE}}$      | estimated |                  |
| $k_{bSmad7_{EE}}$      | estimated |                  |
| $k_{deph_{LRC:Smad7}}$ | estimated |                  |
| $k_{deg_{LRC:Smad7}}$  | estimated |                  |
| $v_{PPM1A}$            | estimated |                  |
| $k_{deg_{PPM1A}}$      | estimated |                  |
| $k_{fPPM1A}$           | estimated |                  |
| $k_{bPPM1A}$           | estimated |                  |
| $k_{rPPM1A}$           | estimated |                  |
| $k_{deph_{PPM1A}}$     | estimated |                  |
| $k_{fPP}$              | estimated |                  |
| $k_{bPP}$              | estimated |                  |
| $k_{rPP}$              | estimated |                  |
| $k_{fPTEN}$            | estimated |                  |
| $k_{bPTEN}$            | estimated |                  |
| $k_{imp_{PPM1A}}$      | estimated |                  |
| $k_{imp_{PP}}$         | estimated |                  |
| $k_{exp_{PP}}$         | estimated |                  |
| $k_{exp_{PTEN}}$       | estimated |                  |

---

|      |     |                  |
|------|-----|------------------|
| kfRI | 100 | (Schmierer 2008) |
| kbRI | 684 | (Schmierer 2008) |

---
