# Supplementary material for: The Self-Limiting Dynamics of TGF-β Signaling In Silico and In Vitro, with Negative Feedback through PPM1A Upregulation
Source: PubMed Central journal article supplement (PMC4105941; doi:10.1371/journal.pcbi.1003573), 2014-06-05
Supplement: pcbi.1003573.s012.pdf [file pcbi.1003573.s012.pdf]

**Table S3:** Reactions Table: All reactions in Models1-8 and Models S1-S3 with rate constants labeled.

|    | Reaction                                                            | Models |
|----|---------------------------------------------------------------------|--------|
| 1  | $\xrightarrow{v_{T1R}} T1R_{Surf}$                                  | All    |
| 2  | $\xrightarrow{v_{T2R}} T2R_{Surf}$                                  | All    |
| 3  | $T1R_{Surf} \xrightleftharpoons[k_{rEE}]{k_{iEE}} T1R_{EE}$         | All    |
| 4  | $T1R_{Surf} \xrightleftharpoons[k_{rCave}]{k_{iCave}} T1R_{Cave}$   | All    |
| 5  | $T2R_{Surf} \xrightleftharpoons[k_{rEE}]{k_{iEE}} T2R_{EE}$         | All    |
| 6  | $T2R_{Surf} \xrightleftharpoons[k_{rCave}]{k_{iCave}} T2R_{Cave}$   | All    |
| 7  | $pT2R_{Surf} \xrightleftharpoons[k_{rEE}]{k_{iEE}} pT2R_{EE}$       | All    |
| 8  | $pT2R_{Surf} \xrightleftharpoons[k_{rCave}]{k_{iCave}} pT2R_{Cave}$ | All    |
| 9  | $T1R_{EE} \xrightarrow{kdeg_{T1R}} \rightarrow$                     | All    |
| 10 | $T2R_{EE} \xrightarrow{kdeg_{T2R}} \rightarrow$                     | All    |
| 11 | $pT2R_{EE} \xrightarrow{kdeg_{T2R}} \rightarrow$                    | All    |
| 12 | $TGF\beta + T2R_{Surf} \xrightarrow{kLRC_1} pT2R_{Surf}$            | All    |
| 13 | $pT2R_{Surf} + T1R_{Surf} \xrightarrow{kLRC_2} LRC_{Surf}$          | All    |
| 14 | $LRC_{Surf} \xrightarrow{k_{iEE}} LRC_{EE}$                         | All    |
| 15 | $LRC_{EE} \xrightarrow{k_{rEE}} T1R:T2R + TGF\beta$                 | All    |
| 16 | $LRC_{Surf} \xrightarrow{k_{iCave}} LRC_{Cave}$                     | All    |
| 17 | $LRC_{Cave} \xrightarrow{k_{rCave}} T1R:T2R + TGF\beta$             | All    |
| 18 | $T1R:T2R \xrightarrow{k_{rR}} T1R_{Surf} + T2R_{Surf}$              | All    |
| 19 | $LRC_{EE} \xrightarrow{kcd} \rightarrow$                            | All    |

|    | Reaction                                                                                              | Models              |
|----|-------------------------------------------------------------------------------------------------------|---------------------|
| 20 | $LRC_{EE} + Smad2_{Cyt} \xrightarrow{kfSmad2} LRC : Smad2$                                            | All                 |
| 21 | $LRC : Smad2 \xrightarrow{krSmad2} LRC_{EE} + pSmad2_{Cyt}$                                           | All                 |
| 22 | $pSmad2_{Cyt} + Smad4_{Cyt} \xrightarrow{kfSmadsComplex} Smad2 : Smad4_{Cyt}$                         | All                 |
| 23 | $pSmad2_{Cyt} + pSmad2_{Cyt} \xrightarrow{kfSmadsComplex} Smad2 : Smad2_{Cyt}$                        | All                 |
| 24 | $pSmad2_{Nuc} + Smad4_{Nuc} \xrightleftharpoons[krSmadsComplex]{kfSmadsComplex} Smad2 : Smad4_{Nuc}$  | All                 |
| 25 | $pSmad2_{Nuc} + pSmad2_{Nuc} \xrightleftharpoons[krSmadsComplex]{kfSmadsComplex} Smad2 : Smad2_{Nuc}$ | All                 |
| 26 | $Smad2_{Cyt} \xrightleftharpoons[kexpSmad2]{kimpSmad2} Smad2_{Nuc}$                                   | All                 |
| 27 | $pSmad2_{Cyt} \xrightleftharpoons[kexpSmad2]{kimpSmad2} pSmad2_{Nuc}$                                 | All                 |
| 28 | $Smad4_{Cyt} \xrightleftharpoons[kexpSmad4]{kimpSmad4} Smad4_{Nuc}$                                   | All                 |
| 29 | $Smad2 : Smad4_{Cyt} \xrightarrow{kimpSmadsComplex} Smad2 : Smad4_{Nuc}$                              | All                 |
| 30 | $Smad2 : Smad2_{Cyt} \xrightarrow{kimpSmadsComplex} Smad2 : Smad2_{Nuc}$                              | All                 |
| 31 | $LRC_{Cave} + Smad7 \xrightarrow{klid} Smad7$                                                         | Model(2,3,5)        |
| 32 | $pSmad2_{Nuc} \xrightarrow{kdeph_pSmad2} Smad2_{Nuc}$                                                 | Model(1,2,5,6,7,S1) |
| 33 | $pSmad2_{Nuc} \xrightarrow{kdeg_pSmad2} \rightarrow$                                                  | Model(4,5,6,7,8)    |
| 34 | $\xrightarrow{vSmad2} Smad2_{Cyt}$                                                                    | Model(7,8)          |
| 35 | $Smad2_{Cyt} \xrightarrow{kdegSmad2} \rightarrow$                                                     | Model(7,8)          |
| 36 | $Smad2_{Nuc} \xrightarrow{kdegSmad2} \rightarrow$                                                     | Model(7,8)          |
| 37 | $pSmad2_{Cyt} \xrightarrow{kdegSmad2} \rightarrow$                                                    | Model(7,8)          |
| 38 | $pSmad2_{Nuc} \xrightarrow{kdegSmad2} \rightarrow$                                                    | Model(7,8)          |
| 39 | $Smad2 : Smad4_{Nuc} \xrightarrow{kSmad7} Smad2 : Smad4_{Nuc} + Smad7$                                | Model(S1)           |

|    | Reaction                                                                                      | Models         |
|----|-----------------------------------------------------------------------------------------------|----------------|
| 40 | $Smad2 : Smad2_{Nuc} \xrightarrow{kSmad7} Smad2 : Smad2_{Nuc} + Smad7$                        | Model(S1)      |
| 41 | $Smad7 \xrightarrow{kcd} \rightarrow$                                                         | Model(S1)      |
| 42 | $LRC_{EE} : Smad7 \xrightarrow{kcd} \rightarrow$                                              | Model(S1)      |
| 43 | $LRC_{Cave} + Smad7 \xrightleftharpoons[krSmad7_{Cave}]{kfSmad7_{Cave}} LRC_{Cave} : Smad7$   | Model(S1)      |
| 44 | $LRC_{EE} + Smad7 \xrightleftharpoons[krSmad7_{EE}]{kfSmad7_{EE}} LRC_{EE} : Smad7$           | Model(S1)      |
| 45 | $LRC_{Cave} : Smad7 \xrightarrow{kdeph_{LRC:Smad7}} dephLRC_{Cave} + Smad7$                   | Model(S1)      |
| 46 | $LRC_{EE} : Smad7 \xrightarrow{kdeph_{LRC:Smad7}} dephLRC_{EE} + Smad7$                       | Model(S1)      |
| 47 | $LRC_{Cave} : Smad7 \xrightarrow{kdeg_{LRC:Smad7}} \rightarrow$                               | Model(S1)      |
| 48 | $LRC_{EE} : Smad7 \xrightarrow{kdeg_{LRC:Smad7}} \rightarrow$                                 | Model(S1)      |
| 49 | $dephLRC_{Cave} \xrightarrow{kr_{Cave}} T1R : T2R + TGF\beta$                                 | Model(S1)      |
| 50 | $dephLRC_{EE} \xrightarrow{kr_{EE}} T1R : T2R + TGF\beta$                                     | Model(S1)      |
| 51 | $\xrightleftharpoons[kdeg_{PPM1A}]{v_{PPM1A}} PPM1A_{Nuc}$                                    | Model(S2)      |
| 52 | $\xrightleftharpoons[kdeg_{PPM1A}]{v_{PPM1A}} PPM1A_{Cyt}$                                    | Model(8,S3)    |
| 53 | $PPM1A_{Nuc} \xrightarrow{kdeg_{PPM1A}} \rightarrow$                                          | Model(8,S3)    |
| 54 | $PPM1A_{Cyt} \xrightarrow{kim_{PPM1A}} PPM1A_{Nuc}$                                           | Model(8,S3)    |
| 55 | $Smad2 : Smad4_{Nuc} \xrightarrow{kPPM1A} Smad2 : Smad4_{Nuc} + PPM1A_{Nuc}$                  | Model(S2)      |
| 56 | $Smad2 : Smad2_{Nuc} \xrightarrow{kPPM1A} Smad2 : Smad2_{Nuc} + PPM1A_{Nuc}$                  | Model(S2)      |
| 57 | $pSmad2_{Nuc} + PPM1A_{Nuc} \xrightleftharpoons[kb_{PPM1A}]{kf_{PPM1A}} pSmad2 : PPM1A_{Nuc}$ | Model(8,S2,S3) |
| 58 | $pSmad2 : PPM1A_{Nuc} \xrightarrow{kdeph_{PPM1A}} Smad2_{Nuc} + PPM1A_{Nuc}$                  | Model(8,S2,S3) |
| 59 | $pSmad2_{Cyt} + PPM1A_{Cyt} \xrightleftharpoons[kb_{PPM1A}]{kf_{PPM1A}} pSmad2 : PPM1A_{Cyt}$ | Model(8,S3)    |

|    | Reaction                                                                                                    | Models      |
|----|-------------------------------------------------------------------------------------------------------------|-------------|
| 60 | $pSmad2 : PPM1A_{Cyt} \xrightarrow{kdeph_{PPM1A}} Smad2_{Cyt} + PPM1A_{Cyt}$                                | Model(8,S3) |
| 61 | $pSmad2_{Nuc} + PTEN : PPM1A_{Nuc} \xrightleftharpoons[kb_{PPM1A}]{kf_{PPM1A}} pSmad2 : PPM1A : PTEN_{Nuc}$ | Model(8,S3) |
| 62 | $pSmad2 : PTEN : PPM1A_{Nuc} \xrightarrow{kdeph_{PPM1A}} Smad2_{Nuc} + PTEN : PPM1A_{Nuc}$                  | Model(8,S3) |
| 63 | $pSmad2_{Cyt} + PTEN : PPM1A_{Cyt} \xrightleftharpoons[kb_{PPM1A}]{kf_{PPM1A}} pSmad2 : PPM1A : PTEN_{Cyt}$ | Model(8,S3) |
| 64 | $pSmad2 : PTEN : PPM1A_{Cyt} \xrightarrow{kdeph_{PPM1A}} Smad2_{Cyt} + PTEN : PPM1A_{Cyt}$                  | Model(8,S3) |
| 65 | $pSmad2_{Cyt} + PTEN_{Cyt} \xrightleftharpoons[kb_{PTEN}]{kf_{PTEN}} pSmad2 : PTEN_{Cyt}$                   | Model(8,S3) |
| 66 | $pSmad2 : PTEN_{Cyt} + PPM1A_{Cyt} \xrightleftharpoons[kb_{PP}]{kf_{PP}} pSmad2 : PTEN : PPM1A_{Cyt}$       | Model(8,S3) |
| 67 | $pSmad2 : PTEN : PPM1A_{Cyt} \xrightarrow{kr_{PP}} pSmad2_{Cyt} + PTEN : PPM1A_{Cyt}$                       | Model(8,S3) |
| 68 | $PTEN : PPM1A_{Cyt} \xrightarrow{kr_{PPM1A}} PTEN_{Cyt} + PPM1A_{Cyt}$                                      | Model(8,S3) |
| 69 | $PTEN : PPM1A_{Nuc} \xrightarrow{kr_{PPM1A}} PTEN_{Nuc} + PPM1A_{Nuc}$                                      | Model(8,S3) |
| 70 | $PTEN : PPM1A_{Cyt} \xrightleftharpoons[kexp_{PP}]{kimp_{PP}} PTEN : PPM1A_{Nuc}$                           | Model(8,S3) |
| 71 | $PTEN_{Nuc} \xrightarrow{kexp_{PTEN}} PTEN_{Cyt}$                                                           | Model(8,S3) |
| 72 | $LRC_{EE} + RI \xrightleftharpoons[kb_{RI}]{kf_{RI}} LRC_{EE} : RI$                                         | All         |
