# Supplementary material for: The Self-Limiting Dynamics of TGF-β Signaling In Silico and In Vitro, with Negative Feedback through PPM1A Upregulation
Source: PubMed Central journal article supplement (PMC4105941; doi:10.1371/journal.pcbi.1003573), 2014-06-05
Supplement: pcbi.1003573.s014.pdf [file pcbi.1003573.s014.pdf]

**Table S5:** Table of Estimated Parameters in Models 1-8 and Models S2-S3.

|                                        | Model 1 | Model 2  | Model 3  | Model 4  | Model 5 | Model 6  | Model 7        | Model 8        | Model S2       | Model S3       |
|----------------------------------------|---------|----------|----------|----------|---------|----------|----------------|----------------|----------------|----------------|
| $kLRC_1$ ( $nM^{-1}min^{-1}$ )         | 213.3   | 79.09    | 1036     | 219.9    | 0.7669  | 2388     | 34.11          | 46.32          | 0.9068         | 2443           |
| $kLRC_2$ ( $nM^{-1}min^{-1}$ )         | 3459    | 22.56    | 7900     | 62.49    | 4.677   | 0.1182   | 1025           | 0.04041        | 0.04956        | 0.0066         |
| $kfSmad2$ ( $nM^{-1}min^{-1}$ )        | 0.03958 | 0.02861  | 8.385e-4 | 0.1599   | 0.04441 | 0.6500   | 0.01185        | 1.252          | 0.9100         | 6.930          |
| $krSmad2$ ( $nM^{-1}min^{-1}$ )        | 2.443e5 | 123.6    | 8598     | 1332     | 113.7   | 2.036e5  | 99.44          | 4546           | 8183           | 1.851e4        |
| $kfSmadsComplex$ ( $nM^{-1}min^{-1}$ ) | 0.4670  | 0.01039  | 0.02771  | 2.586e-5 | 0.03195 | 3.122e-4 | 0.01329        | 1.452          | 1.074          | 2.080          |
| $krSmadsComplex$ ( $nM^{-1}min^{-1}$ ) | 0.2858  | 0.3054   | 4.024    | 2.297e-3 | 1.220   | 0.05235  | 0.1560         | 6.740          | 4.194          | 30.59          |
| $kdeph_{pSmad2}$ ( $min^{-1}$ )        | 999.6   | 1.142    | 0        | 0        | 0.6757  | 11.06    | 9.676          | 0              | 0              | 0              |
| $kdeg_{pSmad2}$ ( $min^{-1}$ )         | 0       | 0        | 0        | 0.6789   | 0.07010 | 0.9444   | 3.163          | 0.5199         | 0              | 0              |
| $v_{Smad2}$ ( $nMmin^{-1}$ )           | 0       | 0        | 0        | 0        | 0       | 0        | <u>5.714</u>   | <u>5.714</u>   | 0              | 0              |
| $kdeg_{Smad2}$ ( $min^{-1}$ )          | 0       | 0        | 0        | 0        | 0       | 0        | <u>0.01000</u> | <u>0.01000</u> | 0              | 0              |
| $klid$ ( $nM^{-1}min^{-1}$ )           | 0       | 6.779e-3 | 313.2    | 0        | 8.579   | 0        | 0              | 0              | 0              | 0              |
| $v_{PPM1A}$ ( $nMmin^{-1}$ )           | 0       | 0        | 0        | 0        | 0       | 0        | 0              | <u>7.000</u>   | <u>0.1000</u>  | <u>7.000</u>   |
| $kdeg_{PPM1A}$ ( $min^{-1}$ )          | 0       | 0        | 0        | 0        | 0       | 0        | 0              | <u>0.07000</u> | <u>0.01000</u> | <u>0.07000</u> |
| $kdeph_{PPM1A}$ ( $min^{-1}$ )         | 0       | 0        | 0        | 0        | 0       | 0        | 0              | 9.356          | 0.3980         | 10.22          |
| $kPPM1A$ ( $min^{-1}$ )                | 0       | 0        | 0        | 0        | 0       | 0        | 0              | 0              | 1.178e-3       | 0              |
| $kfPPM1A$ ( $nM^{-1}min^{-1}$ )        | 0       | 0        | 0        | 0        | 0       | 0        | 0              | 0.1819         | 45.63          | 0.3583         |
| $kbPPM1A$ ( $min^{-1}$ )               | 0       | 0        | 0        | 0        | 0       | 0        | 0              | 41.98          | 7.354          | 282.7          |
| $krPPM1A$ ( $min^{-1}$ )               | 0       | 0        | 0        | 0        | 0       | 0        | 0              | 1.604e-10      | 0              | 3.95e-7        |
| $kfPP$ ( $nM^{-1}min^{-1}$ )           | 0       | 0        | 0        | 0        | 0       | 0        | 0              | 82.26          | 0              | 1355           |
| $kbPP$ ( $min^{-1}$ )                  | 0       | 0        | 0        | 0        | 0       | 0        | 0              | 7.366e-11      | 0              | 5.252e-4       |
| $krPP$ ( $min^{-1}$ )                  | 0       | 0        | 0        | 0        | 0       | 0        | 0              | 0.8848         | 0              | 0.3323         |
| $kfPTEN$ ( $nM^{-1}min^{-1}$ )         | 0       | 0        | 0        | 0        | 0       | 0        | 0              | 6.312          | 0              | 4380           |
| $kbPTEN$ ( $min^{-1}$ )                | 0       | 0        | 0        | 0        | 0       | 0        | 0              | 6.788e-10      | 0              | 3.182e-4       |
| $kimp_{PPM1A}$ ( $min^{-1}$ )          | 0       | 0        | 0        | 0        | 0       | 0        | 0              | <u>0.07</u>    | 0              | <u>0.07</u>    |
| $kimp_{PP}$ ( $min^{-1}$ )             | 0       | 0        | 0        | 0        | 0       | 0        | 0              | 2.378e-3       | 0              | 0.0023         |
| $kexp_{PP}$ ( $min^{-1}$ )             | 0       | 0        | 0        | 0        | 0       | 0        | 0              | 1.145e-10      | 0              | 9.471e-7       |
| $kexp_{PTEN}$ ( $min^{-1}$ )           | 0       | 0        | 0        | 0        | 0       | 0        | 0              | 3.268e-05      | 0              | 26.44          |
| $PTEN_{Cyt}$ (nM)                      | 0       | 0        | 0        | 0        | 0       | 0        | 0              | 176.3          | 0              | 176.4          |

Model S1 is excluded from this table because multiple fitted models (with different parameters) were selected from the structure of Model S1. The underlined values have been manually tuned. All the others were estimated numerically with MATLAB fmincon optimization. The last parameter (for PTEN) is an initial concentration. All the other parameters are rate constants.
