# Supplementary material for: The Self-Limiting Dynamics of TGF-β Signaling In Silico and In Vitro, with Negative Feedback through PPM1A Upregulation
Source: PubMed Central journal article supplement (PMC4105941; doi:10.1371/journal.pcbi.1003573), 2014-06-05
Supplement: pcbi.1003573.s018.pdf [file pcbi.1003573.s018.pdf]

#### **Text S4 PPM1A UPREGULATION Could Possibly Be a Slow-Mode Effect**

A model with R-SMAD DEPHOSPHORYLATION and the phosphatase (PPM1A) upregulated by nuclear phospho-R-Smad (PPM1A UPREGULATION BY EXPRESSION, Model S2) is able to fit to both phospho-R-Smad data after short and long exposure of TGF- $\beta$  (Figure S4A-B). Model S2 also predicted unchanged levels of T1R and total R-Smad, which is consistent with our experiments (Figure S4C-D).
