# Supplementary material for: The Self-Limiting Dynamics of TGF-β Signaling In Silico and In Vitro, with Negative Feedback through PPM1A Upregulation
Source: PLoS Comput Biol. 2014 Jun 5;10(6):e1003573. doi: 10.1371/journal.pcbi.1003573 (PMC4105941; doi:10.1371/journal.pcbi.1003573)
Supplement: Table S4 — Table of negative regulatory effects and their related rate constants. (PDF) [file pcbi.1003573.s013.pdf]

**Table S4:** Table of Negative Regulatory Effects and Their Related Rate Constants

|                         | R-SMAD<br>DEPHOSPHORYLATION | RECEPTOR<br>DEGRADATION | P-SMAD<br>DEGRADATION | ENDOGENOUS SYNTHESIS AND<br>DEGRADATION OF R-SMAD | RECEPTOR<br>INHIBITIONS | PPM1A<br>UPREGULATION<br>BY EXPRESSION | PPM1A<br>STABILIZATION |
|-------------------------|-----------------------------|-------------------------|-----------------------|---------------------------------------------------|-------------------------|----------------------------------------|------------------------|
| kdeph <sub>pSmad2</sub> | estimated                   | 0                       | 0                     | 0                                                 | 0                       | 0                                      | 0                      |
| kdeg <sub>pSmad2</sub>  | 0                           | 0                       | estimated             | estimated                                         | 0                       | 0                                      | 0                      |
| V <sub>Smad2</sub>      | 0                           | 0                       | 0                     | 5.7143 nMmin <sup>-1</sup>                        | 0                       | 0                                      | 0                      |
| kdeg <sub>Smad2</sub>   | 0                           | 0                       | 0                     | 0.01 min <sup>-1</sup>                            | 0                       | 0                                      | 0                      |
| klid                    | 0                           | estimated               | 0                     | 0                                                 | 0                       | 0                                      | 0                      |
| kSmad7                  | 0                           | 0                       | 0                     | 0                                                 | estimated               | 0                                      | 0                      |
| kfSmad7 <sub>cave</sub> | 0                           | 0                       | 0                     | 0                                                 | estimated               | 0                                      | 0                      |
| kbSmad7 <sub>cave</sub> | 0                           | 0                       | 0                     | 0                                                 | estimated               | 0                                      | 0                      |
| kfSmad7 <sub>ee</sub>   | 0                           | 0                       | 0                     | 0                                                 | estimated               | 0                                      | 0                      |
| kbSmad7 <sub>ee</sub>   | 0                           | 0                       | 0                     | 0                                                 | estimated               | 0                                      | 0                      |
| kdeph <sub>LRC</sub>    | 0                           | 0                       | 0                     | 0                                                 | estimated               | 0                                      | 0                      |
| kdeg <sub>LRC</sub>     | 0                           | 0                       | 0                     | 0                                                 | estimated               | 0                                      | 0                      |
| V <sub>PPM1A</sub>      | 0                           | 0                       | 0                     | 0                                                 | 0                       | 0.1 nMmin <sup>-1</sup>                | 7 nMmin <sup>-1</sup>  |
| kdeg <sub>PPM1A</sub>   | 0                           | 0                       | 0                     | 0                                                 | 0                       | 0.01 min <sup>-1</sup>                 | 0.07 min <sup>-1</sup> |
| kdeph <sub>PPM1A</sub>  | 0                           | 0                       | 0                     | 0                                                 | 0                       | estimated                              | estimated              |
| kPPM1A                  | 0                           | 0                       | 0                     | 0                                                 | 0                       | estimated                              | 0                      |
| kfPPM1A                 | 0                           | 0                       | 0                     | 0                                                 | 0                       | 0                                      | estimated              |
| kbPPM1A                 | 0                           | 0                       | 0                     | 0                                                 | 0                       | 0                                      | estimated              |
| krPPM1A                 | 0                           | 0                       | 0                     | 0                                                 | 0                       | 0                                      | estimated              |
| kfPP                    | 0                           | 0                       | 0                     | 0                                                 | 0                       | 0                                      | estimated              |
| kbPP                    | 0                           | 0                       | 0                     | 0                                                 | 0                       | 0                                      | estimated              |
| kfPTEN                  | 0                           | 0                       | 0                     | 0                                                 | 0                       | 0                                      | estimated              |
| kbPTEN                  | 0                           | 0                       | 0                     | 0                                                 | 0                       | 0                                      | estimated              |
| kimp <sub>PPM1A</sub>   | 0                           | 0                       | 0                     | 0                                                 | 0                       | 0                                      | 0.07 min <sup>-1</sup> |
| kimp <sub>pp</sub>      | 0                           | 0                       | 0                     | 0                                                 | 0                       | 0                                      | estimated              |
| kexp <sub>pp</sub>      | 0                           | 0                       | 0                     | 0                                                 | 0                       | 0                                      | estimated              |
| kexp <sub>PTEN</sub>    | 0                           | 0                       | 0                     | 0                                                 | 0                       | 0                                      | estimated              |
